# Supplementary material for: Loss of DUSP4 Expression as a Prognostic Biomarker in Clear Cell Renal Cell Carcinoma
Source: MDPI journal article supplement (doi:10.3390/diagnostics11101939), 2021-10-19
Supplement: s1 [file s1]

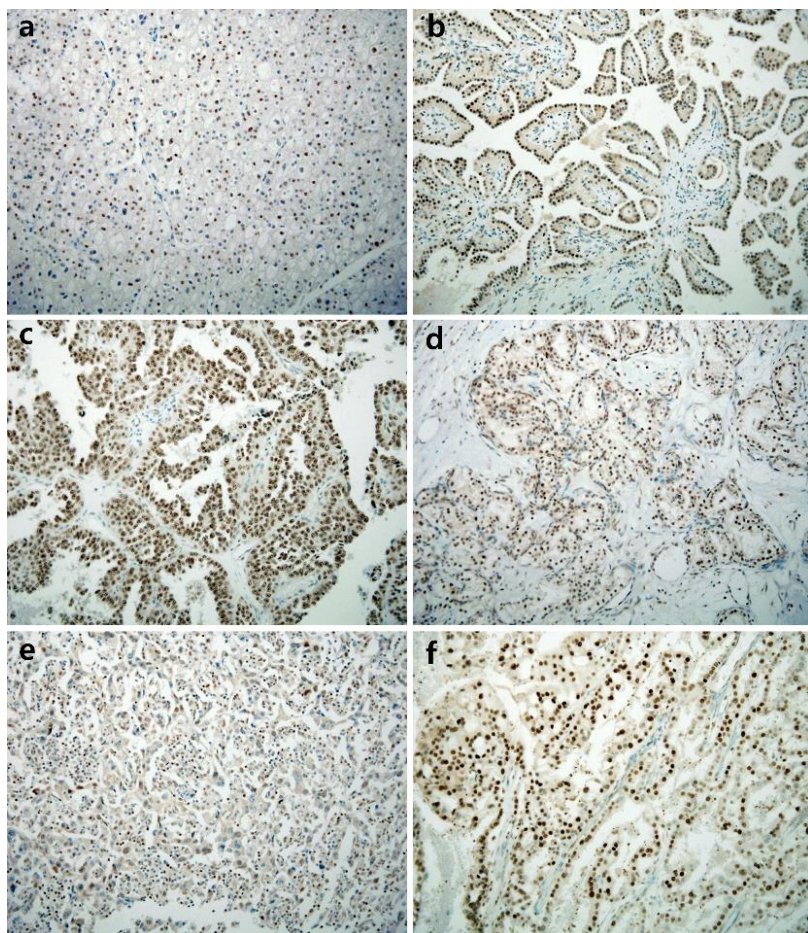

**Figure S1.** Representative photomicrographs of immunohistochemical staining for DUSP4 in other histological subtypes of RCC ((a): Chromophobe RCC, (b): Papillary RCC, type 1, (c): Papillary RCC, type 2, (d): Clear cell papillary RCC, (e): Collecting duct carcinoma, (f): Acquired cystic disease-associated RCC  $\times 200$ ).
